# Supplementary material
Source: publisher figshare collection journal article supplement (https://gsajournals.figshare.com/articles/dataset/_/13759276)
Supplement: Supplementary file 1 [file 1]

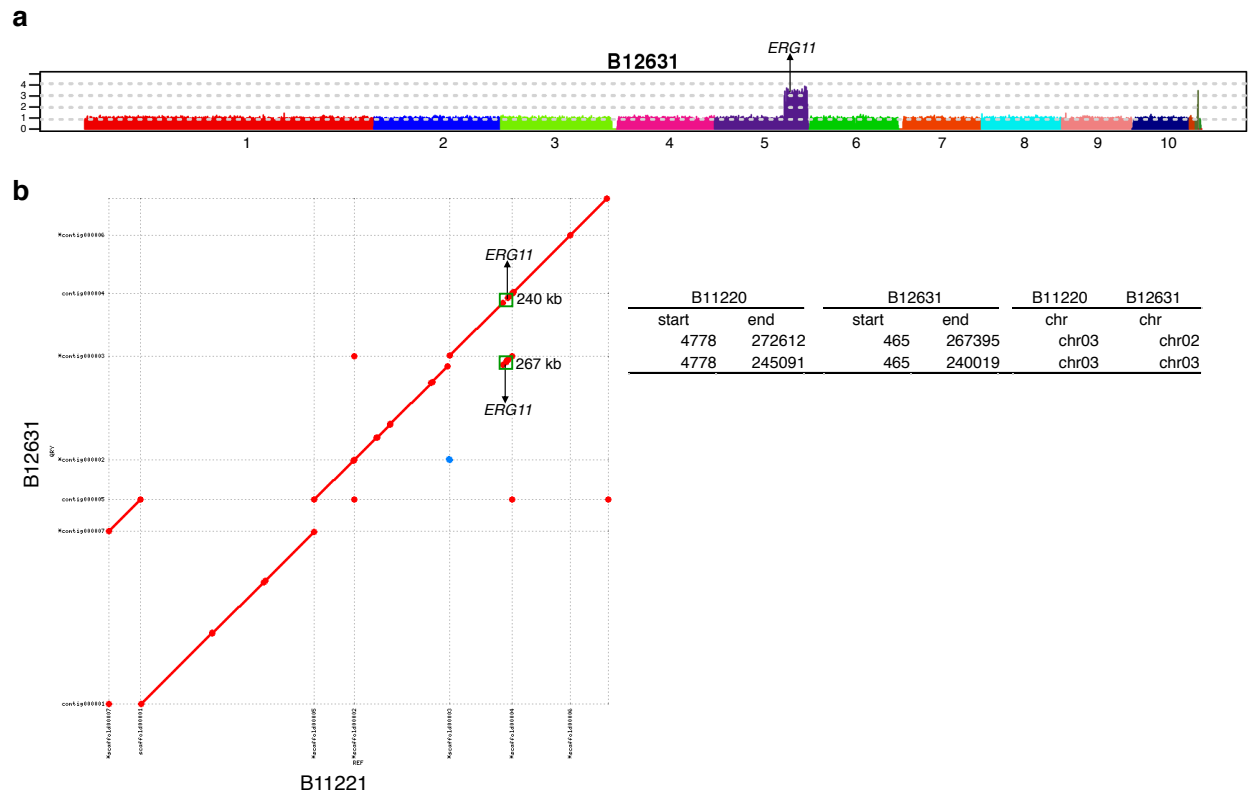

**Supplementary Figure 3.** Segmental duplication of *ERG11* region in B12631. **(a)** Illumina coverage depth of B12631 across the B8841 assembly. **(b)** Mummer (nucmer) alignment of B11221 to B1263 identifies a rearrangement involving a translocation of a copy of the *ERG11* region. The coordinates (start and end) of each segmental duplication are depicted in the box.
