# Supplementary material
Source: publisher figshare collection journal article supplement (https://gsajournals.figshare.com/articles/dataset/_/13759276)
Supplement: Supplementary file 3 [file 1]

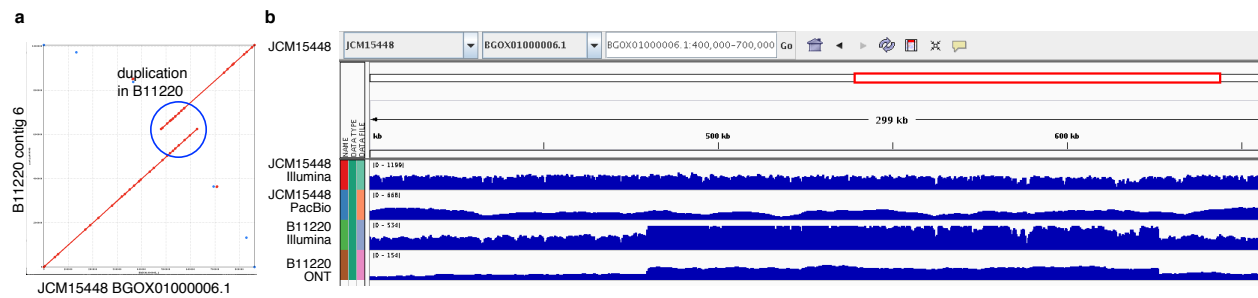

**Supplementary Figure 2.** Segmental duplication of centromere in V11220. **(a)** Shared synteny regions based on whole genome alignments between *C. auris* B11220 (contig6) and JCM15448 (contig6). Blue circle indicates a duplicated region in B11220. **(b)** Integrative Genomics Viewer (IGV) snapshot of short and long read alignment depth from *C. auris* isolates B11220 and JCM15448 aligned to the genome assembly of JCM15448, supporting the large duplication in B11220. This region highlights that both short (Illumina) and long (PacBio) reads do not show a double coverage jump in JCM15448 as observed in B11220.
