# Supplementary material
Source: publisher figshare collection journal article supplement (https://gsajournals.figshare.com/articles/dataset/_/13759276)
Supplement: Supplementary file 4 [file 1]

**a**

|                                   |        |        |  |          |         |  |          |          |  |        |  |               |                     |
|-----------------------------------|--------|--------|--|----------|---------|--|----------|----------|--|--------|--|---------------|---------------------|
| Telomere in B11220 in bases 1-230 | B11220 | B11245 |  | B11220   | B11245  |  | align_in | align_ln |  | pct_id |  | B11220_contig | B11245_contig       |
|                                   | 322    | 13214  |  | 13524    | 660     |  | 12893    | 12865    |  | 95.71  |  | contig000004  | B11245_contig000002 |
|                                   | 22770  | 71172  |  | 1428477  | 1380146 |  | 48403    | 48332    |  | 98.29  |  | contig000004  | B11245_contig000004 |
|                                   |        |        |  | telomere |         |  |          |          |  |        |  |               | Translocation       |

**b**

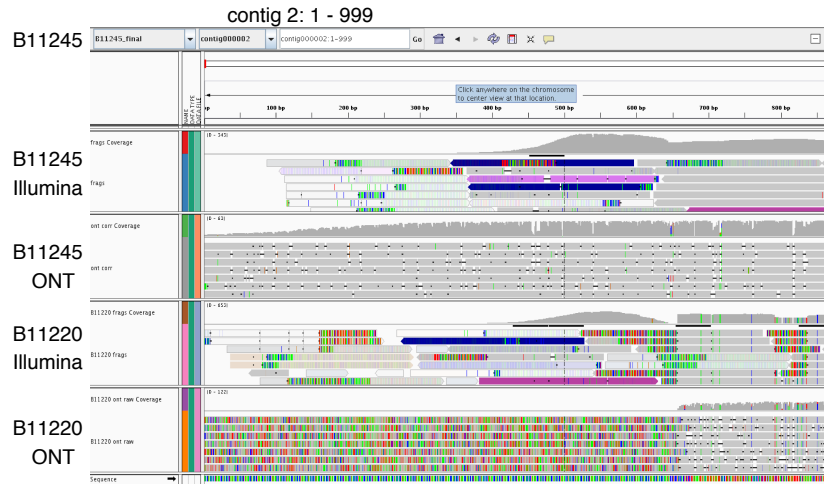

**Supplementary Figure 4. (a)** Whole genome alignment coordinates and identity between *Candida auris* B11220 (Clade II) and B11245 (Clade IV) depicting a chromosomal rearrangement that resulted in an internal telomeric repeat array in B11220 Chromosome 4 (contig 4). **(b)** Integrative Genomics Viewer (IGV) snapshot of short (Illumina) and long (ONT) reads from *C. auris* isolates B11220 (Clade II) and B11245 (Clade IV) aligned to the genome assembly of B11245. These regions highlight the long reads in B11220 where the internal telomeric array is located mapping at the beginning of the translocation.
