# Supplementary material
Source: publisher figshare collection journal article supplement (https://gsajournals.figshare.com/articles/dataset/_/13759276)
Supplement: Supplementary file 5 [file 1]

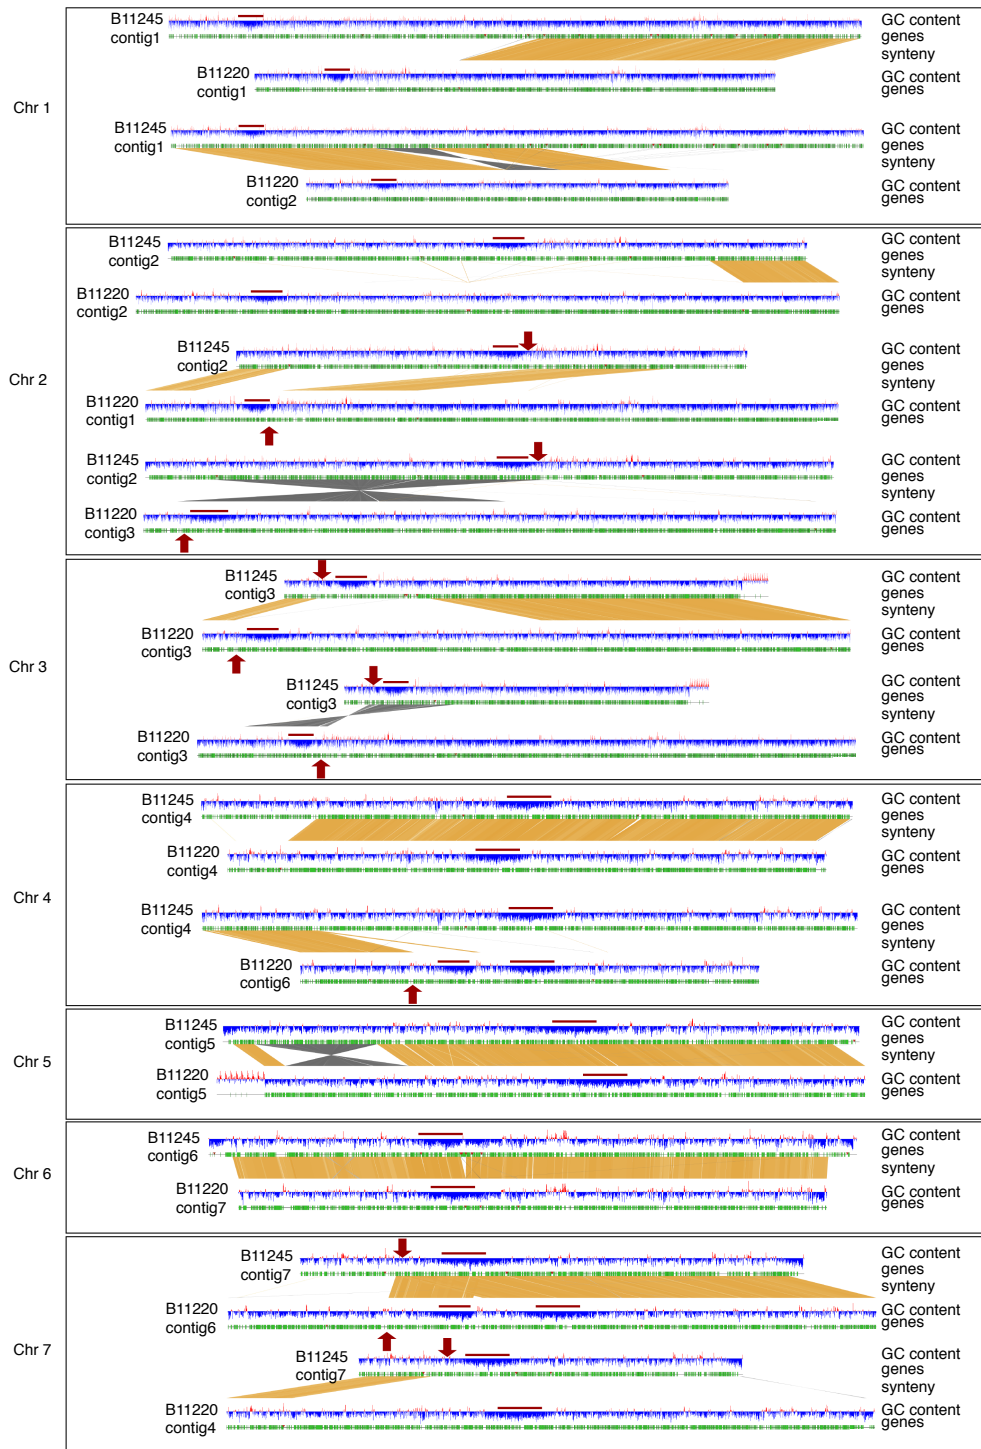

**Supplementary Figure 1.** Chromosomal breakpoints located at predicted candidate positions of centromeres. Chromosome wide synteny between B11245 (Clade IV) and B11220 (Clade II). Shared synteny regions based on genome alignment (blastn) are depicted in orange and gray (inverted regions) vertical blocks connecting the chromosome regions. Genes (green) and GC content (low: blue and high: red) are depicted for each contig. Horizontal dark red lines highlight GC-poor troughs and dark red arrows highlight chromosomal breakpoints adjacent to GC-poor troughs.
