# Supplementary material
Source: publisher figshare collection journal article supplement (https://gsajournals.figshare.com/articles/dataset/_/13759276)
Supplement: Supplementary file 6 [file 1]

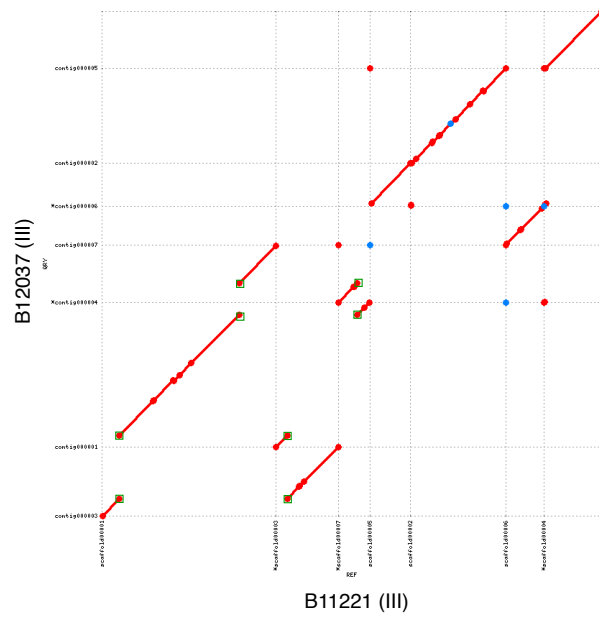

**Supplementary Figure 6.** Shared synteny regions based on whole genome alignments between *C. auris* B12037 and B11221. Green squares highlight translocation breakpoints.
