# Supplementary material
Source: publisher figshare collection journal article supplement (https://gsajournals.figshare.com/articles/dataset/_/13759276)
Supplement: Supplementary file 7 [file 1]

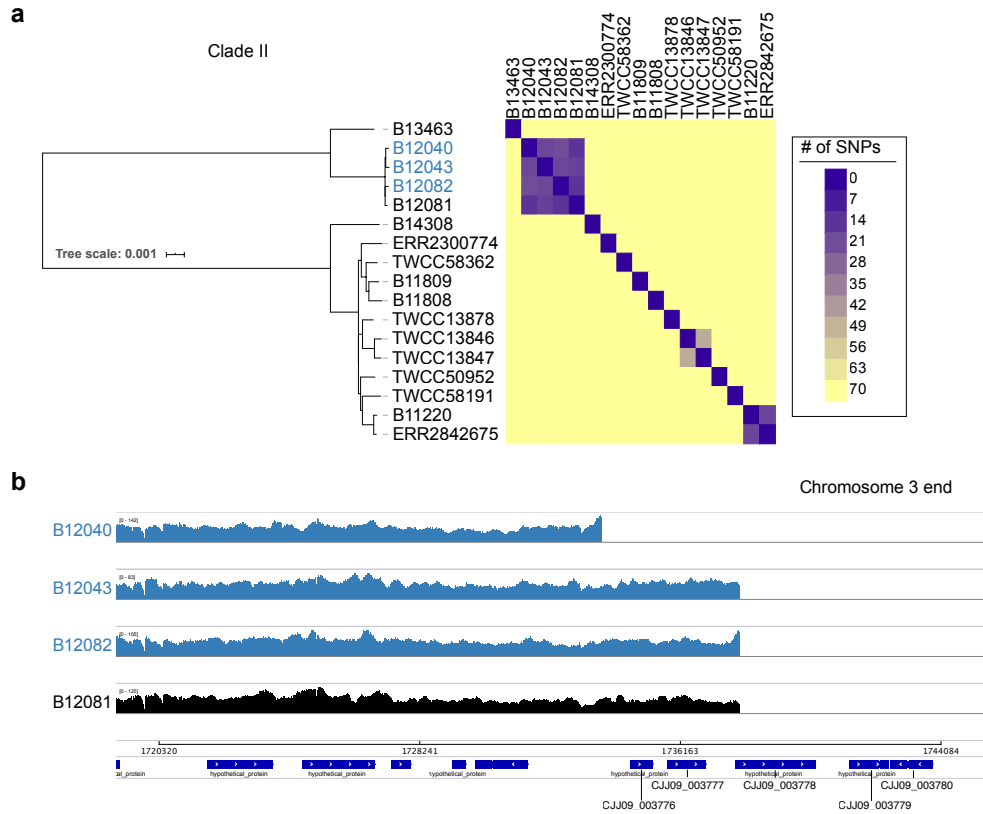

**Supplementary Figure 7.** Subtelomeric variation within a Clade II patient. **(a)** Maximum phylogenetic tree depicts three samples from the same patient in blue. The heatmap shows the number of SNPs between samples and highlights the clonality within samples from the same patient. **(b)** Integrative Genomics Viewer (IGV) snapshot of the coverage using short reads of three samples from the same patient and one clonal isolate mapped to B12245 chromosome 3 subtelomere.
