# Supplementary material
Source: publisher figshare collection journal article supplement (https://gsajournals.figshare.com/articles/dataset/_/13759276)
Supplement: Supplementary file 8 [file 1]

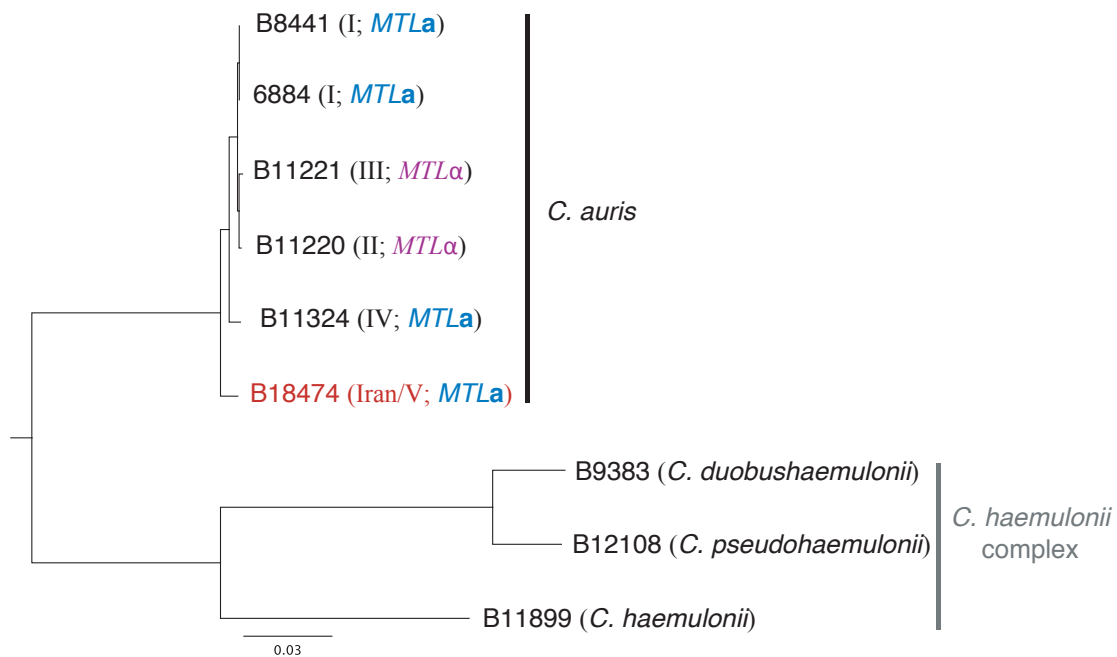

**Supplementary Figure 8.** Maximum likelihood phylogenetic tree using amino acid sequences of six concatenated gene alignments (*ENO1*, *ERG7*, *ERG10*, *GPD1*, *MDR1* and *UPC2*) of *Candida auris* one representative by clade, including clade V (B18474) and one representative from the *C. haemulonii* species complex. Phylogeny was constructed using RAxML v8.2.4
